# Supplementary material
Source: Springer Nature journal article supplement (https://mijn.bsl.nl/resource/supplementary/13047_2009_106_MOESM4_ESM.pdf/7109804)
Supplement: MOESM4 [file 7109804]

# Diagnostic imaging for chronic plantar heel pain: a systematic review and meta-analysis

Andrew M. McMillan, Karl B. Landorf, Joanna T. Barrett, Hylton B. Menz, Adam R. Bird

## Additional Data File 4. Included studies

| Principal Author | Year | Title                                                                                                    | Journal                |
|------------------|------|----------------------------------------------------------------------------------------------------------|------------------------|
| Akfirat          | 2003 | Ultrasonographic appearance of the plantar fasciitis.                                                    | Clin Imaging           |
| Berkowitz        | 1991 | Plantar fasciitis: MR imaging.                                                                           | Radiology              |
| Bygrave          | 1998 | Diagnosing plantar fasciitis with ultrasound using Planscan.                                             | Foot                   |
| Cardinal         | 1996 | Plantar fasciitis: sonographic evaluation.                                                               | Radiology              |
| Cetin            | 2001 | Evaluation of chronic plantar fasciitis by scintigraphy and relation to clinical parameters.             | J Musculoskeletal Pain |
| Genc             | 2005 | Long-term ultrasonographic follow-up of plantar fasciitis patients treated with steroid injection.       | Joint Bone Spine       |
| Gibbon           | 1999 | Ultrasound of the plantar aponeurosis (fascia).                                                          | Skeletal Radiol        |
| Hall             | 1996 | Magnetic resonance imaging in the evaluation of heel pain.                                               | Orthopedics            |
| Kamel            | 2000 | High frequency ultrasonographic findings in plantar fasciitis and assessment of local steroid injection. | J Rheumatol            |
| Karabay          | 2007 | Ultrasonographic evaluation in plantar fasciitis.                                                        | J Foot Ankle Surg      |
| O'Duffy          | 1998 | Foot pain: specific indications for scintigraphy.                                                        | Br J Rheumatol         |
| Osborne          | 2006 | Critical differences in lateral X-rays with and without a diagnosis of plantar fasciitis.                | J Sci & Med in Sport   |
| Ozdemir          | 2005 | Sonographic evaluation of plantar fasciitis and relation to body mass index.                             | Eur J Radiol           |
| Prichasuk        | 1994 | The relationship of pes planus and calcaneal spur to plantar heel pain.                                  | Clin Orthop            |
| Sabir            | 2005 | Clinical utility of sonography in diagnosing plantar fasciitis.                                          | J Ultrasound Med       |
| Tsai             | 2000 | Ultrasound evaluation of plantar fasciitis.                                                              | Scand J Rheumatol      |
| Turgut           | 1999 | The relationship of heel pad elasticity and plantar heel pain.                                           | Clin Orthop            |
| Vohra            | 2002 | Ultrasonographic evaluation of plantar fascia bands. A retrospective study of 211 symptomatic feet.      | J Am Podiatr Med Assoc |
| Wainwright       | 1995 | Calcaneal spurs and plantar fasciitis.                                                                   | Foot                   |
| Wall             | 1993 | Ultrasound diagnosis of plantar fasciitis.                                                               | Foot Ankle             |
| Walther          | 2004 | Power Doppler findings in plantar fasciitis.                                                             | Ultrasound Med Biol    |
| Wearing          | 2007 | Plantar fasciitis: are pain and fascial thickness associated with arch shape and loading?                | Phys Ther              |
| Williams         | 1987 | Imaging study of the painful heel syndrome.                                                              | Foot Ankle             |
